# Supplementary material
Source: publisher figshare collection journal article supplement (https://acs.figshare.com/ndownloader/files/3964864)
Supplement: Supplementary file 1 [file 3964864]

1 Supporting Information for:

2 Urinary pyrethroid and chlorpyrifos metabolite concentrations in northern California families  
3 and their relationship to indoor residential insecticide levels, part of SUPERB.

4

5 Kelly J. Trunnelle, Deborah H. Bennett, Nicolle S. Tolve, Matthew Scott Clifton, Mark D. Davis,  
6 Antonia M. Calafat, Rebecca Moran, Daniel J. Tancredi, Irva Hertz-Picciotto

7

8 Summary:

9 Length = 3 pages

10 Contents:

- 11 • Table S1. A selection of pyrethroid parent compounds and their metabolites.
- 12 • Results. Urinary concentrations of *trans*-DCCA, *cis*-DBCA and 4F3PBA
- 13 • Table S2. Number of samples with detectable\* urinary concentrations of *trans*-DCCA,  
14 *cis*-DBCA and 4F3PBA and range of concentrations both volume-based (ng/mL) and  
15 creatinine-adjusted ( $\mu\text{g/g}$ ) from a subset of SUPERB participants recruited in 2009.

16

17

18

19

20

21

22

23

24 **Supporting Information**25 **Introduction**26 **Table S1.** A selection of pyrethroid parent compounds and their metabolites.

| Metabolite | Parent Compound(s)                                                                      |
|------------|-----------------------------------------------------------------------------------------|
| 3PBA       | cyhalothrin<br>cypermethrin<br>deltamethrin<br>esfenvalerate<br>permethrin<br>sumithrin |
| 4F3PBA     | cyfluthrin                                                                              |
| DCCA       | cyfluthrin<br>cypermethrin<br>permethrin                                                |
| DBCA       | deltamethrin                                                                            |

27

28

29 **Results**30 *Urinary concentrations of trans-DCCA, cis-DBCA and 4F3PBA*

31 *Trans*-DCCA was detected in 2 children and 8 adults, none of whom were from the same  
 32 household. *Cis*-DBCA was detected in 2 children and 1 adult, with one household having both a  
 33 child and an adult with detectable concentrations. 4F3PBA was detected in 3 children and 8  
 34 adults, with only 1 household having detectable concentrations in both the adult and child. A  
 35 summary of *trans*-DCCA, *cis*-DBCA and 4F3PBA detection frequency and concentration ranges  
 36 are presented in Table S2.

37 We looked at the co-occurrence of specific urinary pyrethroid metabolites within individual  
 38 participants. All adult and child urine samples with detectable concentrations of *trans*-DCCA,  
 39 *cis*-DBCA or 4F3PBA also had detectable concentrations of 3PBA, with the exception of one  
 40 child's urine sample having a detectable concentration of 4F3PBA and no detectable

41 concentration of any other pyrethroid metabolite. Of the 8 adults with detectable *trans*-DCCA  
 42 urinary concentrations, 3 also had detectable 4F3PBA concentrations. Those 3 adult participants  
 43 had 3 of the 4 highest urinary concentrations of 3PBA. Most notable was one adult who had the  
 44 highest urinary concentrations of both *trans*-DCCA (121.4 ng/mL) and 4F3PBA (22.5 ng/mL) of  
 45 the entire sample (adults and children), and who also had the highest urinary concentration of  
 46 3PBA (44.8 ng/mL) of the adults.

47

48 **Table S2.** Number of samples with detectable\* urinary concentrations of *trans*-DCCA, *cis*-  
 49 DBCA and 4F3PBA and range of concentrations both volume-based (ng/mL) and creatinine-  
 50 adjusted ( $\mu\text{g/g}$ ) from a subset of SUPERB participants recruited in 2009.

51

| Category (n)       | #D |                     | Min  | Max  |
|--------------------|----|---------------------|------|------|
| Children (83)      |    |                     |      |      |
| <i>trans</i> -DCCA | 2  | Volume-based        | 10.0 | 111  |
|                    |    | Creatinine-adjusted | 26.2 | 77.2 |
| <i>cis</i> -DBCA   | 2  | Volume-based        | 1.09 | 1.48 |
|                    |    | Creatinine-adjusted | 0.87 | 0.60 |
| 4F3PBA             | 3  | Volume-volume based | 0.49 | 0.77 |
|                    |    | Creatinine-adjusted | 0.99 | 0.77 |
| Adults (90)        |    |                     |      |      |
| <i>trans</i> -DCCA | 8  | Volume-based        | 4.99 | 121  |
|                    |    | Creatinine-adjusted | 2.79 | 119  |
| <i>cis</i> -DBCA   | 1  | Volume-based        |      | 1.32 |
|                    |    | Creatinine-adjusted |      | 1.03 |
| 4F3PBA             | 8  | Volume-based        | 0.43 | 22.4 |
|                    |    | Creatinine-adjusted | 0.13 | 22.1 |

52 \* The limits of detection (LODs) were 1.11–2.54 ng/mL (*trans*-DCCA), 0.16–0.74 ng/mL (*cis*-  
 53 DBCA), and 0.32 ng/mL (4F3PBA)

54
